# Supplementary material
Source: ML conference proceedings conference paper supplement (https://openaccess.thecvf.com/content/CVPR2026/html/Luddecke_LiDeRe_A_Lightweight_CVPR_2026_paper.html)
Supplement: Supplementary file 1 [file Luddecke_LiDeRe_A_Lightweight_CVPR_2026_supplemental.pdf]

**LiDeRe: A Lightweight Readout for Fast and Data-Efficient Dense Prediction**Timo Lüddecke<sup>1</sup>, Jan Frederik Meier<sup>1</sup>, Jan van Delden<sup>1</sup>, Alexander Ecker<sup>1,2</sup><sup>1</sup>University of Göttingen <sup>2</sup>MPI for Dynamics and Self-Organization<https://eckerlab.org/code/lidere>**Pose Estimation Implementation Details**

For the pose experiments, we use the iRodent and Horse-30 parts of SuperAnimal Quadruped dataset and the provided training-test splits. The dataset is available here: <https://zenodo.org/records/14016777>

Following the protocol of SuperAnimal, we evaluate on cropped animals (bounding boxes are provided in the dataset). RMSE scores are computed in the original image space. For mAP computation we use pycocotools and set detections scores to 1 for all detections.

**Hyperparameters**

Below we provide the hyperparameters for all datasets.

|          | n_iterations | bs | lr    | val_interval | wd   | amp | cos_lr |
|----------|--------------|----|-------|--------------|------|-----|--------|
| Leaf     | 500          | 32 | 0.001 | 50           | 0.01 | ✓   | ✓      |
| Camo     | 1000         | 32 | 0.001 | 100          | 0.01 | ✓   | -      |
| Trans10k | 3000         | 32 | 0.001 | 250          | 0.01 | ✓   | -      |
| iRodent  | 2500         | 16 | 0.001 | -            | 0.01 | ✓   | ✓      |
| Horse10  | 10000        | 16 | 0.001 | -            | 0.01 | ✓   | ✓      |
| PlantDoc | 7000         | 32 | 0.001 | 250          | 0.01 | ✓   | -      |
| BSDS500  | 3000         | 32 | 0.001 | 250          | 0.01 | ✓   | ✓      |

Table 1: Hyperparameters of the experiments.

**Model Details: Implicit MLP**

Input (4D) for position  $\mathbf{p}^F \in \mathbb{R}^2$  in the feature volume and query position  $\mathbf{p}^T \in \mathbb{R}^2$ , which are both normalized to be in  $[0, 1]$ , the MLP receives the following input vector  $[\mathbf{p}_0^F - \mathbf{p}_0^T, \mathbf{p}_1^F - \mathbf{p}_1^T, (\mathbf{p}_0^F - \mathbf{p}_0^T)^2, (\mathbf{p}_1^F - \mathbf{p}_1^T)^2]$ .

The implicit MLP has this architecture:

[Linear(4, 32), Sine, Linear(32, 32), Sine, Linear(32, 8)]

## Visualizations

We visualize the prediction of our model with different backbones and the linear evaluation baseline (Figure 1).

## Repetitions

To increase the reliability of our reported scores, we average the scores of three training runs for all detection (Table 2) and pose estimation experiments (Tables 3). Below all scores are reported.

|                                          | mAP $\uparrow$ |      |      | mAP50 $\uparrow$ |      |      |
|------------------------------------------|----------------|------|------|------------------|------|------|
|                                          | 1              | 2    | 3    | 1                | 2    | 3    |
| ours                                     | 49.6           | 45   | 46.9 | 70.9             | 66.3 | 68.9 |
| ours + LoRA                              | 48.2           | 45.3 | 47.5 | 68.6             | 68.0 | 66.8 |
| ours (ViT-L)                             | 49.7           | 52.1 | 51   | 72.6             | 75.5 | 72.6 |
| ours (ViT-L) + LoRA                      | 48.2           | 53.5 | 51.5 | 66.2             | 73.1 | 69.1 |
| no interp. prior (I)                     | 40.5           | 40.8 | 42.4 | 62.9             | 64.8 | 65.4 |
| no feedforward (FF)                      | 45.4           | 46.3 | 43.9 | 65.3             | 66.4 | 65.5 |
| no content-guided att. (A <sub>C</sub> ) | 42.7           | 41.8 | 44.1 | 62.5             | 63.1 | 64.9 |
| none (I, FF, A <sub>C</sub> )            | 39.0           | 38.1 | 34.2 | 61.8             | 60.8 | 57.5 |
| Lin. eval                                | 24.9           | 25.1 | 26.2 | 50.6             | 51.9 | 51.1 |
| Lin. eval + LoRA                         | 26.3           | 26   | 25.7 | 52.9             | 51.5 | 51.8 |

Table 2: Three repetitions for object detection on PlantDoc

|                                          | iRodent           |      |      |                |      |      | Horse10           |      |      |                |      |      |
|------------------------------------------|-------------------|------|------|----------------|------|------|-------------------|------|------|----------------|------|------|
|                                          | RMSE $\downarrow$ |      |      | mAP $\uparrow$ |      |      | RMSE $\downarrow$ |      |      | mAP $\uparrow$ |      |      |
|                                          | 1                 | 2    | 3    | 1              | 2    | 3    | 1                 | 2    | 3    | 1              | 2    | 3    |
| ours                                     | 30.7              | 30.0 | 29.9 | 70.4           | 71.0 | 70.6 | 3.12              | 3.43 | 3.24 | 87.9           | 86.2 | 87.0 |
| ours + LoRA                              | 30.5              | 30.0 | 28.9 | 71.6           | 73.6 | 73.3 | 1.78              | 1.73 | 1.71 | 93.8           | 94.5 | 94.8 |
| ours (ViT-L)                             | 27.8              | 28.2 | 29.4 | 73.9           | 72.9 | 71.6 | 2.89              | 2.21 | 2.17 | 90.4           | 93.4 | 93.4 |
| ours (ViT-L) + LoRA                      | 28.0              | 27.1 | 28.8 | 72.7           | 73.7 | 75.0 | 1.58              | 1.55 | 1.57 | 96.5           | 96.4 | 96.0 |
| no interp. prior (I)                     | 31.9              | 34.2 | 34.0 | 68.0           | 67.9 | 67.4 | 4.61              | 4.5  | 4.13 | 81.6           | 82.1 | 83.5 |
| no feedforward (FF)                      | 33.5              | 32.0 | 31.7 | 65.2           | 68.8 | 67.5 | 3.33              | 2.95 | 3.06 | 87.0           | 87.5 | 87.3 |
| no content-guided att. (A <sub>C</sub> ) | 30.3              | 30.5 | 31.4 | 70.2           | 71.0 | 69.3 | 3.35              | 3.56 | 3.67 | 86.9           | 85.6 | 85.4 |
| none (I, FF, A <sub>C</sub> )            | 35.6              | 34.3 | 34.5 | 61.4           | 62.1 | 63.5 | 4.37              | 4.12 | 4.42 | 81.9           | 82.3 | 82.2 |
| Lin. eval                                | 52.4              | 52.4 | 52.7 | 47.0           | 47.3 | 46.5 | 7.41              | 7.41 | 7.4  | 68.0           | 67.8 | 67.9 |
| Lin. eval + LoRA                         | 39.1              | 35.5 | 33.2 | 56.2           | 61.9 | 64.1 | 2.31              | 2.43 | 2.37 | 89.4           | 88.7 | 89.7 |

Table 3: Three repetitions for pose estimation.

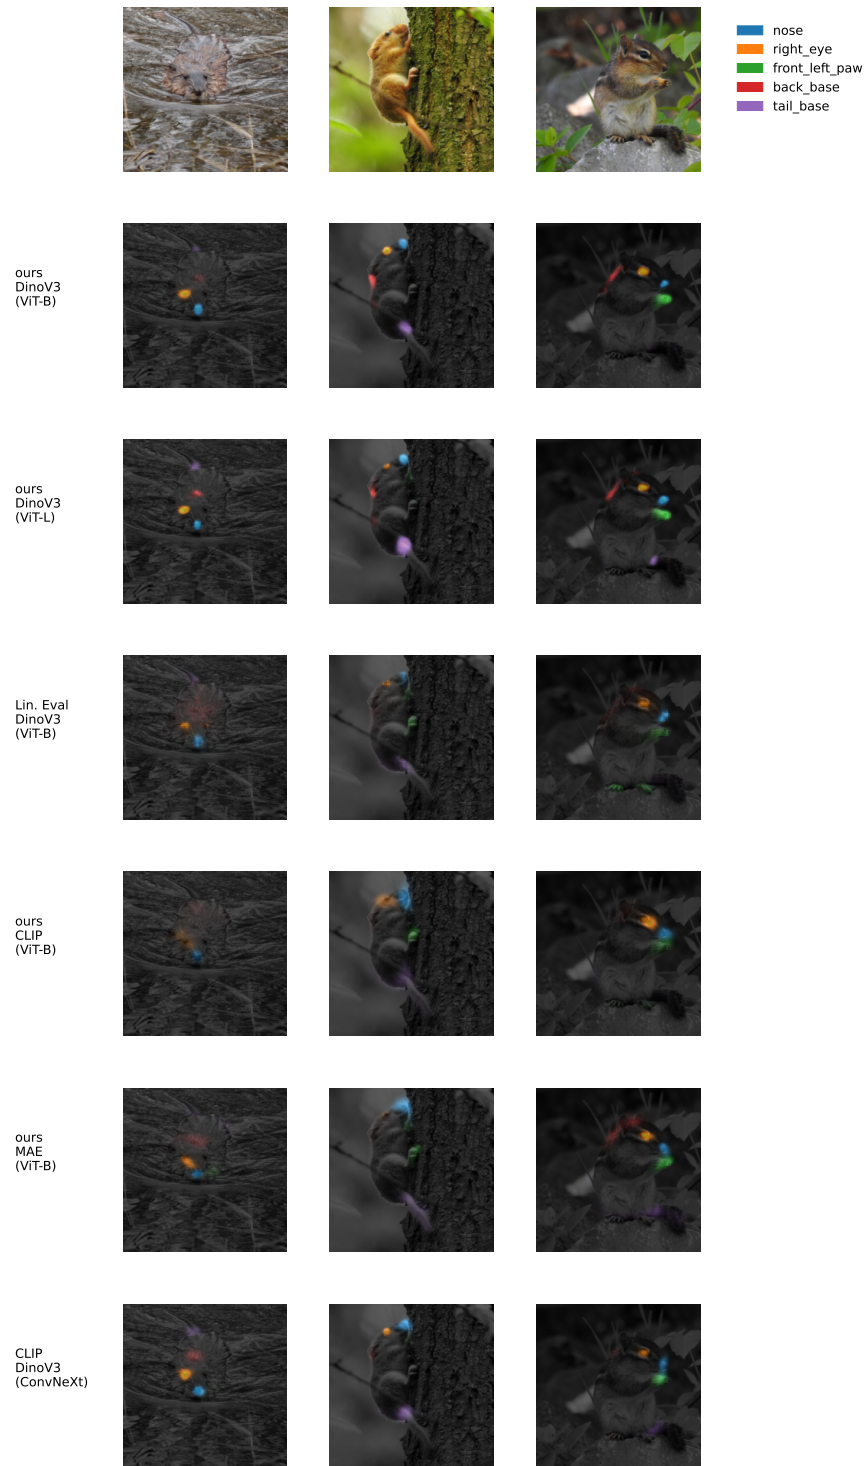

Figure 1: Visualization of the keypoint heatmaps of the  $\mathfrak{R}^3$ iRodent dataset. Each color corresponds to a different keypoint.
